# Supplementary material for: Functional up-regulation of Nav1.8 sodium channel in Aβ afferent fibers subjected to chronic peripheral inflammation
Source: PubMed Central journal article supplement (PMC4007624; doi:10.1186/1742-2094-11-45), 2014-03-07
Supplement: 1742-2094-11-45-S2.pdf [file 1742-2094-11-45-S2.pdf]

|                    | <b>Peak I<sub>Na</sub> currents<br/>(pA/pF)</b> | <b>V<sub>1/2act</sub> (mV)</b> | <b>k<sub>act</sub></b> |
|--------------------|-------------------------------------------------|--------------------------------|------------------------|
| <b>Sham</b>        | 90.72 ± 4.58<br>(11)                            | -32.66 ± 0.81                  | 3.04 ± 0.41            |
| <b>3d<br/>(n)</b>  | 122.09 ± 4,93***<br>(11)                        | -33,99 ± 1,92                  | 2.33 ± 0.5             |
| <b>8d<br/>(n)</b>  | 112,78 ± 5.24*<br>(8)                           | -39.68 ± 1,63**                | 2.68 ± 0.41            |
| <b>14d<br/>(n)</b> | 135.43 ± 4.06***, \$<br>(8)                     | -31.55 ± 0.82 <sup>\$</sup>    | 0.95 ± 0.08            |

**Supplemental Table 2**
