# Supplementary material for: Functional up-regulation of Nav1.8 sodium channel in Aβ afferent fibers subjected to chronic peripheral inflammation
Source: PubMed Central journal article supplement (PMC4007624; doi:10.1186/1742-2094-11-45), 2014-03-07
Supplement: 1742-2094-11-45-S3.pdf [file 1742-2094-11-45-S3.pdf]

|                                                  | <b>Peak Na<sub>v</sub>1.8<br/>currents<br/>(pA/pF)</b> | <b>V<sub>1/2act</sub> (mV)</b>      | <b>k<sub>act</sub></b> | <b>V<sub>1/2inact</sub> (mV)</b>  | <b>k<sub>inact</sub></b> |
|--------------------------------------------------|--------------------------------------------------------|-------------------------------------|------------------------|-----------------------------------|--------------------------|
| <b>Sham<br/>(n)</b>                              | 49.62 ± 2.4<br>(13)                                    | -8.79 ± 1.01<br>(13)                | 2.68 ± 0.35            | -33.6 ± 0.29<br>(9)               | 5.7 ± 0.09               |
| <b>Day 3<br/>(n)</b>                             | 63.68 ± 6.04*<br>(6)                                   | -9.3 ± 0.23<br>(6)                  | 1.77 ± 0.35            | -39.9 ± 1.34**<br>(7)             | 6.49 ± 0.8               |
| <b>Day 8<br/>(n)</b>                             | 72.56 ± 2.91***<br>(7)                                 | -12.26 ± 1.61<br>(7)                | 3.2 ± 0.4              | -38.4 ± 1.1*<br>(11)              | 6.05 ± 0.26              |
| <b>Day 14<br/>(n)</b>                            | 108.06 ± 1.52***<br>SSS, ###<br>(7)                    | -20.25 ± 0.63***<br>SSS, ###<br>(7) | 2.39 ± 0.65            | -56.3 ± 1.3***<br>SSS, ###<br>(9) | 6.49 ± 0.5               |
| <b>Day 14 +<br/>ambroxol<br/>(20 μM)<br/>(n)</b> | 10.68 ± 3.67###<br>(6)                                 | -8.52 ± 3.39###<br>(6)              | 4.4 ± 0.61             | NT                                | NT                       |

**Supplemental Table 3**
